# Supplementary material for: Epidemiology and the Impact of Acute Kidney Injury on Outcomes in Patients with Rhabdomyolysis
Source: MDPI journal article supplement (doi:10.3390/jcm10091950), 2021-05-01
Supplement: s1 [file s1]

**Supplement Table 1. International Classification of Diseases (ICD-10) code for medical comorbidities**

|                          |                                                                                                                                                                                                                                                                                                                                                                                                                                                                                                    |
|--------------------------|----------------------------------------------------------------------------------------------------------------------------------------------------------------------------------------------------------------------------------------------------------------------------------------------------------------------------------------------------------------------------------------------------------------------------------------------------------------------------------------------------|
| Hypertension             | I10 Essential (primary) hypertension                                                                                                                                                                                                                                                                                                                                                                                                                                                               |
| CKD                      | N18 Chronic kidney disease (CKD)<br>N18.1 Chronic kidney disease, stage 1<br>N18.2 Chronic kidney disease, stage 2 (mild)<br>N18.3 Chronic kidney disease, stage 3 (moderate)<br>N18.30 Chronic kidney disease, stage 3 unspecified<br>N18.31 Chronic kidney disease, stage 3a<br>N18.32 Chronic kidney disease, stage 3b<br>N18.4 Chronic kidney disease, stage 4 (severe)<br>N18.5 Chronic kidney disease, stage 5<br>N18.6 End stage renal disease<br>N18.9 Chronic kidney disease, unspecified |
| Congestive heart failure | I50 Heart failure<br>I09.81 Rheumatic heart failure<br>I11.0 Hypertensive heart disease with heart failure<br>I13.0 Hypertensive heart and chronic kidney disease with heart failure and stage 1 through stage 4 chronic kidney disease, or unspecified chronic kidney disease<br>I13.2 Hypertensive heart and chronic kidney disease with heart failure and with stage 5 chronic kidney disease, or end stage renal disease                                                                       |
| Coronary artery disease  | I25 Chronic ischemic heart disease                                                                                                                                                                                                                                                                                                                                                                                                                                                                 |
| Diabetes mellitus        | E08 Diabetes mellitus due to underlying condition<br>E09 Drug or chemical induced diabetes mellitus<br>E10 Type 1 diabetes mellitus<br>E11 Type 2 diabetes mellitus<br>E13 Other specified diabetes mellitus                                                                                                                                                                                                                                                                                       |
| Atrial fibrillation      | I48 Atrial fibrillation and flutter                                                                                                                                                                                                                                                                                                                                                                                                                                                                |
| Hyperlipidemia           | E78 Disorders of lipoprotein metabolism and other lipidemia                                                                                                                                                                                                                                                                                                                                                                                                                                        |
| Dementia                 | F03.9 Unspecified dementia                                                                                                                                                                                                                                                                                                                                                                                                                                                                         |
| HIV                      | B20 Human immunodeficiency virus [HIV] disease                                                                                                                                                                                                                                                                                                                                                                                                                                                     |
| Alcohol use              | F10 Alcohol related disorders                                                                                                                                                                                                                                                                                                                                                                                                                                                                      |
| Opioid use               | F11 Opioid related disorders                                                                                                                                                                                                                                                                                                                                                                                                                                                                       |
| Cannabis use             | F12 Cannabis related disorders                                                                                                                                                                                                                                                                                                                                                                                                                                                                     |
| Cocaine use              | F14 Cocaine related disorders                                                                                                                                                                                                                                                                                                                                                                                                                                                                      |
| Trauma                   | S00-S09 Injuries to the head<br>S10-S19 Injuries to the neck<br>S20-S29 Injuries to the thorax<br>S30-S39 Injuries to the abdomen, lower back, lumbar spine, pelvis and external genitals<br>S40-S49 Injuries to the shoulder and upper arm                                                                                                                                                                                                                                                        |

|  |                                                                                                                                                                                                                                                                                                                                |
|--|--------------------------------------------------------------------------------------------------------------------------------------------------------------------------------------------------------------------------------------------------------------------------------------------------------------------------------|
|  | S50-S59 Injuries to the elbow and forearm<br>S60-S69 Injuries to the wrist, hand and fingers<br>S70-S79 Injuries to the hip and thigh<br>S80-S89 Injuries to the knee and lower leg<br>S90-S99 Injuries to the ankle and foot<br>T07-T07 Injuries involving multiple body regions<br>T14-T14 Injury of unspecified body region |
|--|--------------------------------------------------------------------------------------------------------------------------------------------------------------------------------------------------------------------------------------------------------------------------------------------------------------------------------|

**Supplement Table 2. International Classification of Diseases (ICD-10) code for complications**

|                         |                                                                                                                                                                                                                                                                                                                                                                                              |
|-------------------------|----------------------------------------------------------------------------------------------------------------------------------------------------------------------------------------------------------------------------------------------------------------------------------------------------------------------------------------------------------------------------------------------|
| Hyperkalemia            | E875 Hyperkalemia                                                                                                                                                                                                                                                                                                                                                                            |
| Electrolyte abnormality | E870 Hyperosmolality and hypernatremia<br>E871 Hypo-osmolality and hyponatremia<br>E875 Hyperkalemia<br>E876 Hypokalemia<br>E833 Disorders of phosphorus metabolism and phosphatases<br>E834 Disorders of magnesium metabolism<br>E835 Disorders of calcium metabolism                                                                                                                       |
| DIC                     | D65 Disseminated intravascular coagulation [defibrination syndrome]                                                                                                                                                                                                                                                                                                                          |
| Hypovolemic shock       | R571 Hypovolemic shock                                                                                                                                                                                                                                                                                                                                                                       |
| Mechanical ventilation  | 0BH17EZ Insertion of Endotracheal Airway into Trachea, Via Natural or Artificial Opening<br>5A1935Z Respiratory Ventilation, Less than 24 Consecutive Hours<br>5A1945Z Respiratory Ventilation, 24-96 Consecutive Hours<br>5A1955Z Respiratory Ventilation, Greater than 96 Consecutive Hours                                                                                                |
| Hemodialysis            | Z99.2 Dependence on renal dialysis<br>Z49.01 Encounter for fitting and adjustment of extracorporeal dialysis catheter<br>5A1D70Z Performance of Urinary Filtration, Intermittent, Less than 6 Hours Per Day<br>5A1D80Z Performance of Urinary Filtration, Prolonged Intermittent, 6-18 hours Per Day<br>5A1D90Z Performance of Urinary Filtration, Continuous, Greater than 18 hours Per Day |
